# Supplementary material for: Functionalized TiO2 nanoparticles by single-step hydrothermal synthesis: the role of the silane coupling agents
Source: PubMed Central journal article supplement (PMC5301916; doi:10.3762/bjnano.8.33), 2017-01-31
Supplement: Beilstein_J_Nanotechnol-08-304-s001.pdf [file Beilstein_J_Nanotechnol-08-304-s001.pdf]

# Supporting Information

for

## **Functionalized TiO<sub>2</sub> nanoparticles by single-step hydrothermal synthesis: the role of the silane coupling agents**

Antoine R. M. Dalod<sup>1</sup>, Lars Henriksen<sup>2</sup>, Tor Grande<sup>1</sup> and Mari-Ann Einarsrud<sup>\*,§1</sup>

Address: <sup>1</sup> Department of Materials Science and Engineering, NTNU, Norwegian University of Science and Technology, NO-7491 Trondheim, Norway and <sup>2</sup> poLight AS, Kongeveien 77, NO-3188 Horten, Norway

Email: Mari-Ann Einarsrud\* - mari-ann.einarsrud@ntnu.no

\*Corresponding author

§Telephone: +47 73 59 40 02

### **Additional experimental data**

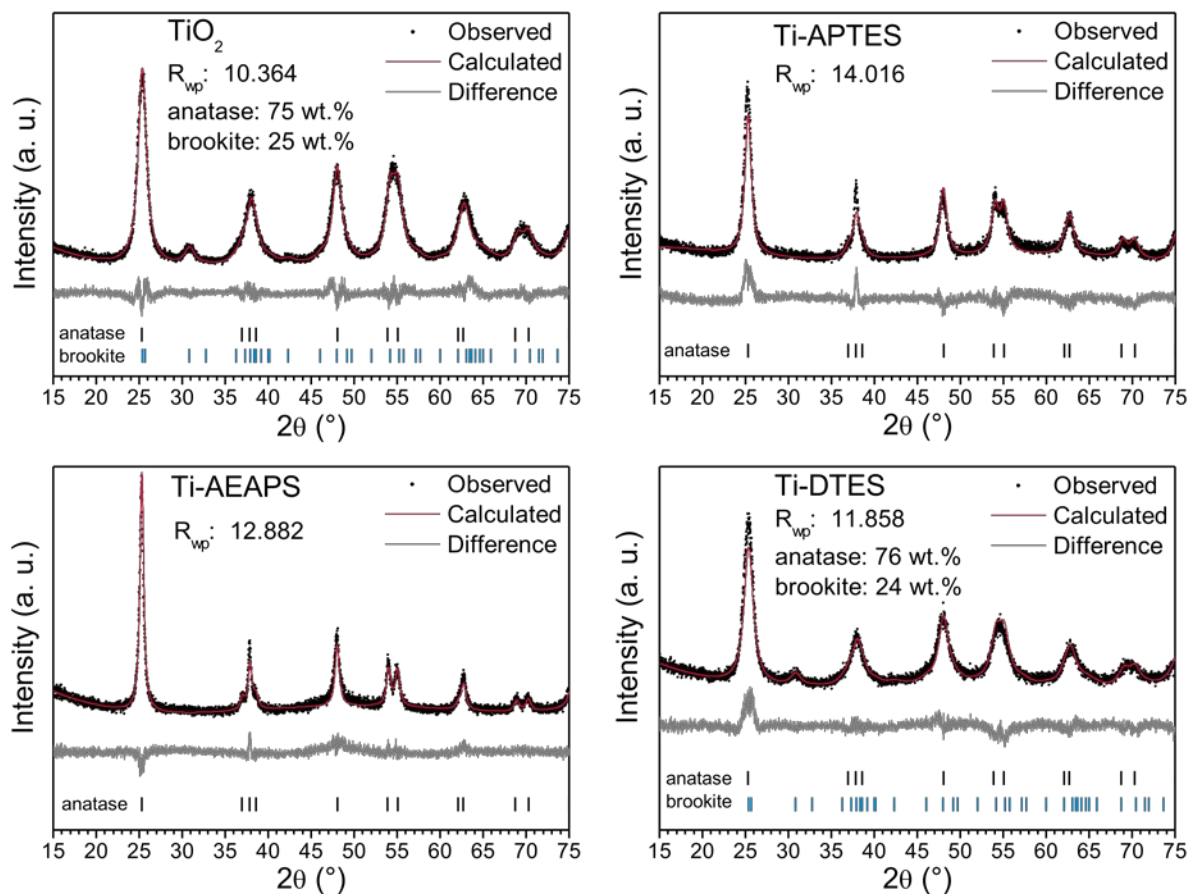

**Figure S1:** Rietveld refinements of TiO<sub>2</sub> and in situ surface-functionalized TiO<sub>2</sub> nanoparticles diffractograms (bars show diffraction lines of anatase from ICDD card #00-021-1272 and brookite from ICDD card #00-029-1360).

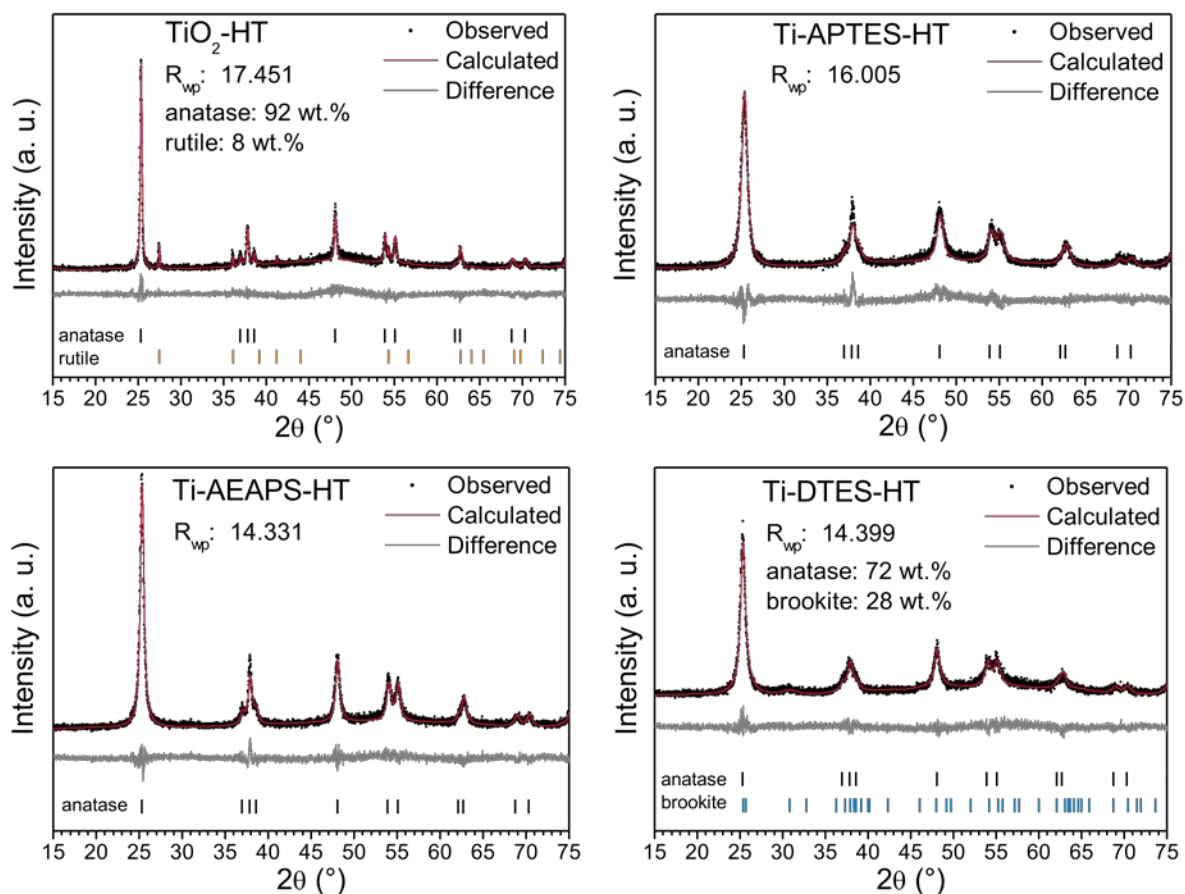

**Figure S2:** Rietveld refinements of heat treated TiO<sub>2</sub> and in situ surface-functionalized TiO<sub>2</sub> nanoparticles diffractograms (bars show diffraction lines of anatase from ICDD card #00-021-1272, brookite from ICDD card #00-029-1360, and rutile from ICDD card #00-021-1276).

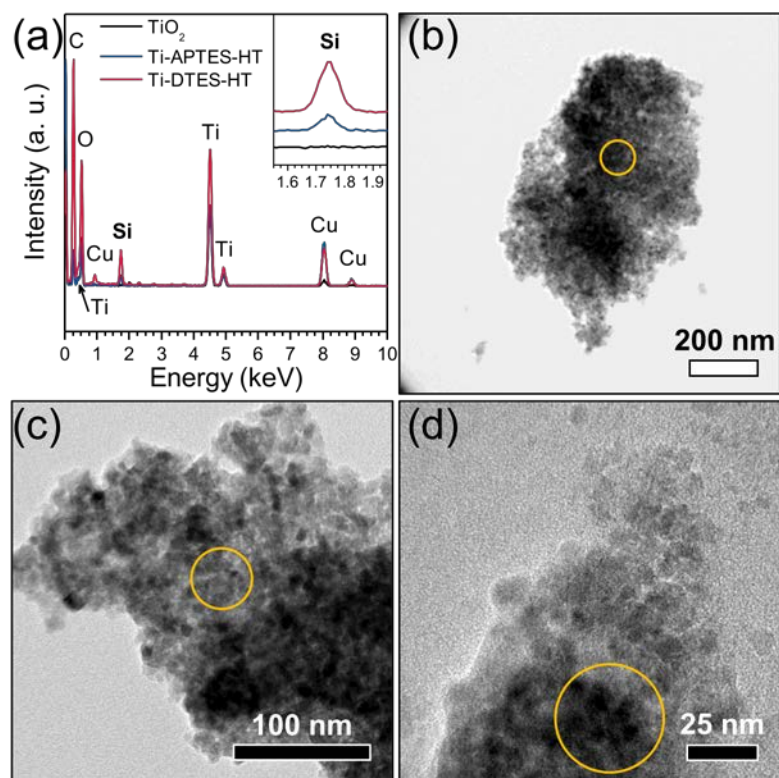

**Figure S3:** (a) EDS spectra from samples area (yellow circles) shown on TEM images of (b)  $\text{TiO}_2$ , (c) Ti-APTES-HT, and (d) Ti-DTES-HT, respectively.

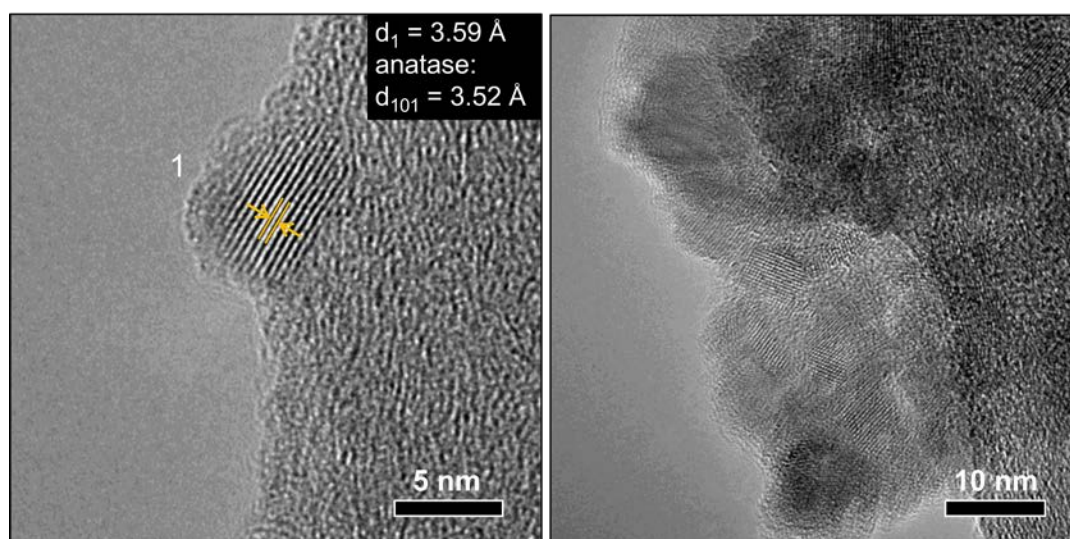

**Figure S4:** HR-TEM images of Ti-APTES-HT.

**Table S1:** Assignments of characteristic IR-bands of TiO<sub>2</sub> and *in situ* surface functionalized TiO<sub>2</sub> nanoparticles.

| wave number (cm <sup>-1</sup> ) | assignment                                 | sample                     | references |
|---------------------------------|--------------------------------------------|----------------------------|------------|
| <900                            | Ti–O–Ti                                    | all                        | [1-4]      |
| 910                             | Ti–O–Si                                    | all functionalized samples | [1-6]      |
| 1020 and 1120                   | Si–O–Si                                    | all functionalized samples | [1-8]      |
| 1220                            | Si–CH <sub>2</sub> R                       | all functionalized samples | [3,5,8]    |
| 1260                            | Si–CH <sub>3</sub>                         | Ti-AEAPS                   | [3,5,9]    |
| 1380                            | CH <sub>3</sub> (deformation)              | Ti-DTES                    | [3]        |
| 1460                            | CH <sub>2</sub> (deformation)              | all functionalized samples | [3,8,10]   |
| 1530 and 3200–3500              | N–H                                        | Ti-APTES, Ti-AEAPS         | [1,3,8,10] |
| 1640 and 2500–3600              | adsorbed H <sub>2</sub> O and<br>OH groups | all                        | [1,3,7,8]  |
| 2850 and 2920                   | CH <sub>2</sub> (stretching)               | all functionalized samples | [1-3,8,11] |
| 2870 and 2960                   | CH <sub>3</sub> (stretching)               | Ti-DTES                    | [3,11]     |

## References

- [1] Zhao, J.; Milanova, M.; Warmoeskerken, M. M. C. G.; Dutschk, V. *Colloids Surf., A* **2012**, *413*, 273–279. doi:10.1016/j.colsurfa.2011.11.033
- [2] Wang, C.; Mao, H.; Wang, C.; Fu, S. *Ind. Eng. Chem. Res.* **2011**, *50*, 11930–11934. doi:10.1021/ie200887x
- [3] Socrates, G. *Infrared and Raman characteristic group frequencies: Tables and charts*; John Wiley & Sons: Chichester, UK, 2001.
- [4] Koziej, D.; Fischer, F.; Kränzlin, N.; Caseri, W. R.; Niederberger, M. *ACS Appl. Mater. Interfaces* **2009**, *1*, 1097–1104. doi:10.1021/am9000584
- [5] Matinlinna, J. P.; Laajalehto, K.; Lassila, L. V. J.; Yli-Urpo, A.; Vallittu, P. K. FT-IR and XPS surface characterization of allyltrimethoxysilane and 3-

- methacryloxypropyltrimethoxysilane mixture adsorbed onto titanium substrate. In *Silanes and other coupling agents*; K. L. Mittal, Ed.; CRC Press: Boca Raton, FL, USA, 2004; Vol. 3, pp 21–37. doi:10.1201/b12184-5
- [6] Milanesi, F.; Cappelletti, G.; Annunziata, R.; Bianchi, C. L.; Meroni, D.; Ardizzone, S. *J. Phys. Chem. C* **2010**, *114*, 8287–8293. doi:10.1021/jp1014669
- [7] Chen, Q.; Yakovlev, N. L. *Appl. Surf. Sci.* **2010**, *257*, 1395–1400. doi:10.1016/j.apsusc.2010.08.036
- [8] Plodinec, M.; Gajović, A.; Iveković, D.; Tomašić, N.; Zimmermann, B.; Macan, J.; Haramina, T.; Su, D. S.; Willinger, M. *Nanotechnology* **2014**, *25*, 435601. doi:10.1088/0957-4484/25/43/435601
- [9] Czarnobaj, K. *Polym. Bull.* **2011**, *66*, 223–237. doi:10.1007/s00289-010-0332-8
- [10] Iijima, M.; Kobayakawa, M.; Kamiya, H. *J. Colloid Interface Sci.* **2009**, *337*, 61–65. doi:10.1016/j.jcis.2009.05.007
- [11] Porter, M. D.; Bright, T. B.; Allara, D. L.; Chidsey, C. E. D. *J. Am. Chem. Soc.* **1987**, *109*, 3559–3568. doi:10.1021/ja00246a011
